# Supplementary material for: A Simple Assay to Assess Salmonella Typhimurium Impact on Performance and Immune Status of Growing Pigs after Different Inoculation Doses
Source: MDPI journal article supplement (doi:10.3390/microorganisms11020446), 2023-02-10
Supplement: s1 [file s1]

**Table S1.** Rectal temperatures (°C) of growing pigs orally challenged or not with *Salmonella* Typhimurium.

| Days post-inoculation | Inoculation level, CFU |                     |                       | SEM  | P-value |
|-----------------------|------------------------|---------------------|-----------------------|------|---------|
|                       | 0 (Basal)              | 1 × 10 <sup>8</sup> | 1.5 × 10 <sup>8</sup> |      |         |
| 1                     | 39.1                   | 39.2                | 39.2                  | 0.05 | 0.71    |
| 2                     | 39.2                   | 39.3                | 39.2                  | 0.05 | 0.58    |
| 3                     | 38.9                   | 39.0                | 39.0                  | 0.06 | 0.17    |
| 4                     | 39.2                   | 39.0                | 39.1                  | 0.05 | 0.11    |
| 5                     | 39.1                   | 38.9                | 38.9                  | 0.04 | 0.11    |
| 6                     | 39.1                   | 39.1                | 39.1                  | 0.04 | 0.99    |
| 7                     | 38.9                   | 38.9                | 39.0                  | 0.05 | 0.80    |

SEM, Standard error of the mean.

**Table S2.** Incidence of diarrhea<sup>1</sup> after *Salmonella* Typhimurium inoculation.

| Days post-inoculation | Inoculation level, CFU |                       | P-value |
|-----------------------|------------------------|-----------------------|---------|
|                       | 1 × 10 <sup>8</sup>    | 1.5 × 10 <sup>8</sup> |         |
| 1                     | 20%                    | 50%                   | 0.13    |
| 2                     | 50%                    | 40%                   | 0.49    |
| 3                     | 90%                    | 60%                   | 0.28    |
| 4                     | 70%                    | 50%                   | 0.32    |
| 5                     | 80%                    | 50%                   | 0.24    |
| 6                     | 60%                    | 70%                   | 0.67    |
| 7                     | 50%                    | 40%                   | 0.49    |

<sup>1</sup>The percentage of diarrhea was calculated as a proportion of the total number of pigs showing feces scored as 1 and 2 per treatment from 1 to 7 dpi.

**Table S3.** Blood parameters in growing pigs orally challenged or not with *Salmonella* Typhimurium.

| Item                         | Inoculation level, CFU |                     |                       | SEM  | P-value |
|------------------------------|------------------------|---------------------|-----------------------|------|---------|
|                              | 0 (Basal)              | 1 × 10 <sup>8</sup> | 1.5 × 10 <sup>8</sup> |      |         |
| Leucocytes, mm <sup>3</sup>  |                        |                     |                       |      |         |
| 7 dpi                        | 18,320                 | 21,080              | 19,530                | 1683 | 0.37    |
| 14 dpi                       | 18,510                 | 18,650              | 18,430                | 1273 | 0.73    |
| Lymphocytes, mm <sup>3</sup> |                        |                     |                       |      |         |
| 7 dpi                        | 8,543                  | 11,788              | 9,427                 | 1360 | 0.39    |
| 14 dpi                       | 9,658                  | 10,490              | 10,732                | 727  | 0.73    |
| Monocytes, mm <sup>3</sup>   |                        |                     |                       |      |         |
| 7 dpi                        | 1,110                  | 1,345               | 1,186                 | 133  | 0.39    |
| 14 dpi                       | 1,045                  | 1,115               | 1,103                 | 78   | 0.96    |
| Neutrophils, mm <sup>3</sup> |                        |                     |                       |      |         |
| 7 dpi                        | 7,368                  | 7,507               | 8,551                 | 760  | 0.85    |
| 14 dpi                       | 5,758                  | 6,535               | 6,256                 | 565  | 0.33    |
| Hematocrit, %                |                        |                     |                       |      |         |
| 7 dpi                        | 35.4 <sup>b</sup>      | 37.0 <sup>ab</sup>  | 37.7 <sup>a</sup>     | 0.64 | 0.03    |
| 14 dpi                       | 35.1 <sup>b</sup>      | 36.9 <sup>a</sup>   | 39.3 <sup>a</sup>     | 0.68 | <0.05   |
| Hemoglobin, g/dL             |                        |                     |                       |      |         |
| 7 dpi                        | 10.5 <sup>b</sup>      | 11.1 <sup>a</sup>   | 11.0 <sup>ab</sup>    | 0.18 | 0.05    |
| 14 dpi                       | 10.5 <sup>b</sup>      | 11.2 <sup>a</sup>   | 11.3 <sup>a</sup>     | 0.20 | <0.01   |

SEM, Standard error of the mean.

<sup>a,b</sup> Within a row, means not sharing the same superscript letter differ,  $p < 0.05$ .
